# Supplementary material for: High-performance electron-transporting hybrid rylenes with low threshold voltage
Source: Royal Society of Chemistry journal article supplement (doi:10.1039/c3tc31644k), 2013-01-01

## Supporting Information

# High-performance electron-transporting hybrid rylenes with low threshold voltage

Xiangguang Li, Chengyi Xiao, Wei Jiang\* and Zhaohui Wang\*

Beijing National Laboratory for Molecular Sciences, Organic Solids Laboratory,  
Institute of Chemistry, Chinese Academy of sciences, Beijing 100190, China. and

University of Chinese Academy of Sciences, Beijing 100049, China

E-mail: jiangwei@iccas.ac.cn; wangzhaohui@iccas.ac.cn

## Table of Contents

|                                                         |           |
|---------------------------------------------------------|-----------|
| <b>1. Thin-Film Absorptions of Compounds 3a-3d.....</b> | <b>S2</b> |
| <b>2. TGA of Compounds 3a-3d.....</b>                   | <b>S3</b> |
| <b>3. DSC of Compounds 3a-3d.....</b>                   | <b>S3</b> |
| <b>4. OFETs Characteristics of 3a-3d.....</b>           | <b>S4</b> |
| <b>5. AFM Images of 3a-3d.....</b>                      | <b>S6</b> |
| <b>6. NMR and MS Spectra of Compounds 3a-3d.....</b>    | <b>S7</b> |

### 1, Thin-Film Absorptions of Compounds 3a-3d

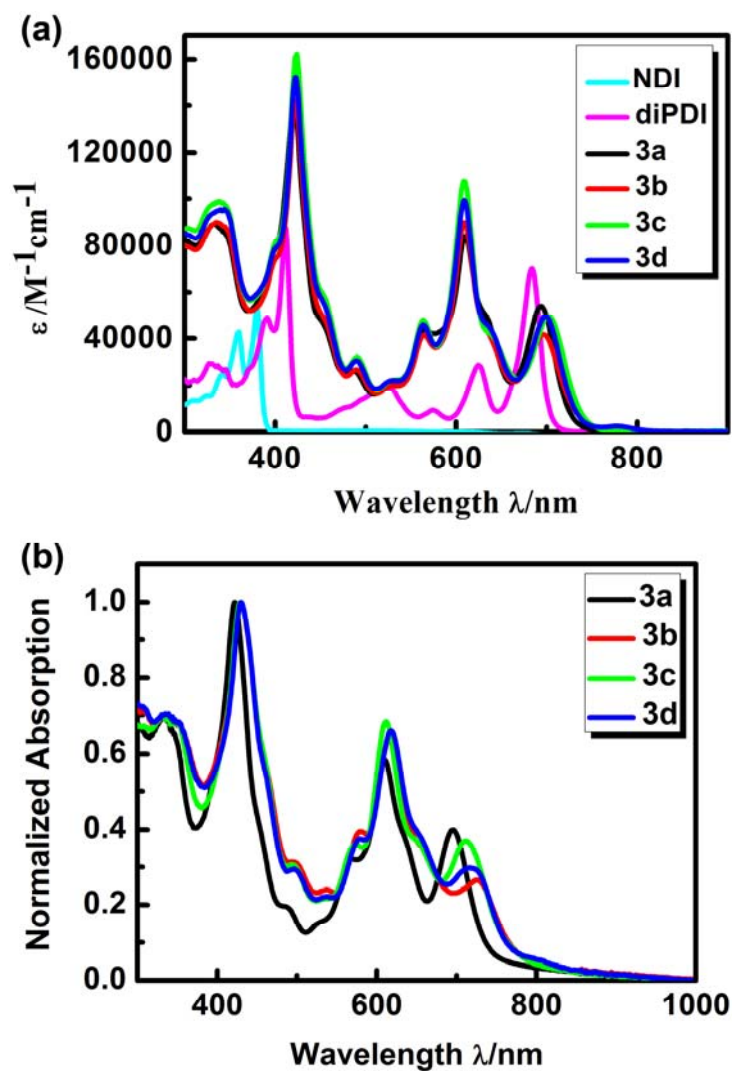

**Fig. S1** (a) UV-vis absorption spectra of compounds NDI, diPDI, and **3a-3d** in CHCl<sub>3</sub> solution ( $1 \times 10^{-5}$  mol/L, NDI: N,N'-di-n-octyl-naphthalene-1,4,5,8-tetracarboxylic acid diimide, diPDI: N,N'-di(2,6-diisopropylphenyl)-perylene-3,4:9,10-tetracarboxylic acid bisimide). (b) Normalized absorption spectra of compounds **3a-3d** in thin films.

## 2, TGA of Compounds 3a-3d

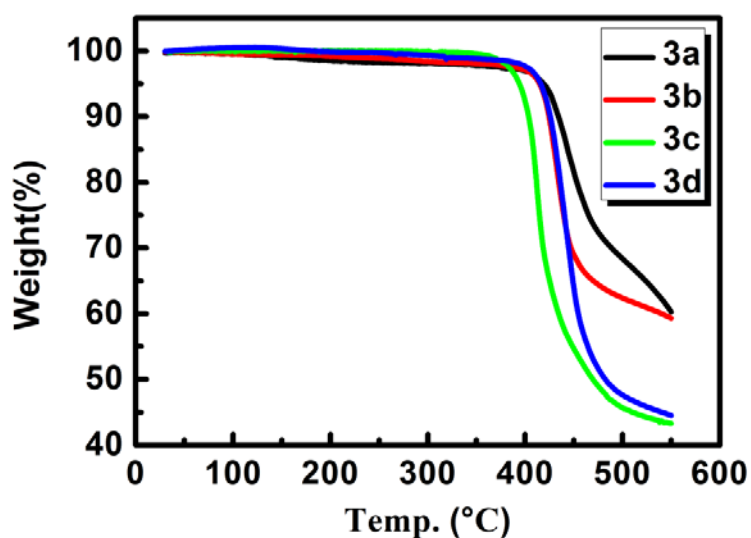

Fig. S2 Thermogravimetric analysis of compounds 3a-3d

## 3, DSC of Compounds 3a-3d

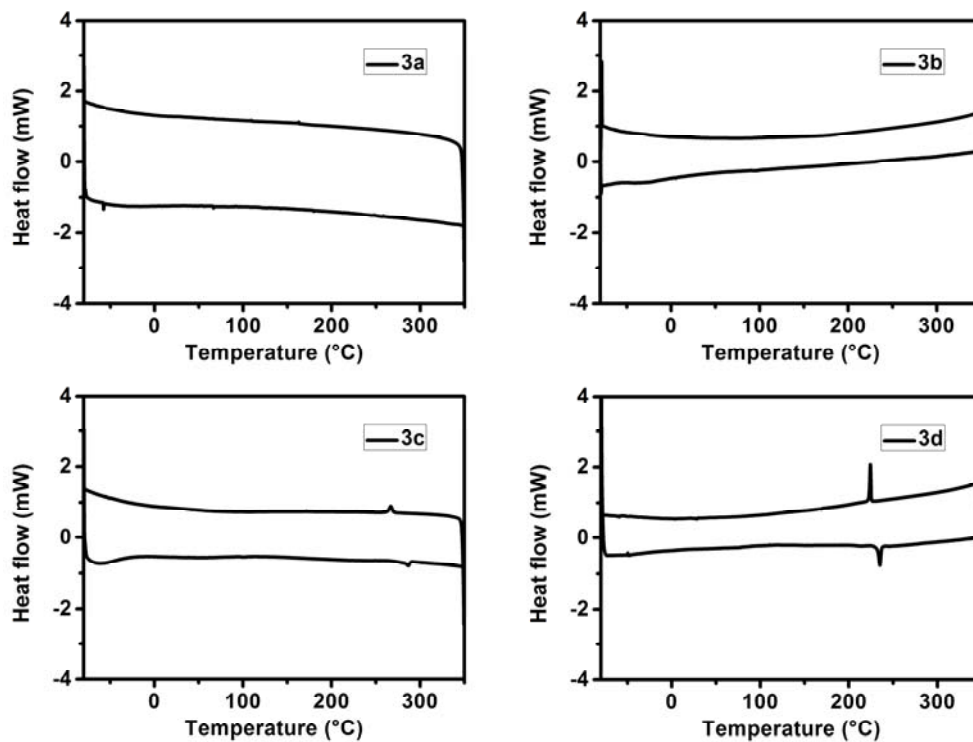

Fig. S3 Differential scanning calorimetry (DSC) curves of powder of compound 3a-3d  
(Upward peaks indicate exothermic processes, while downward peaks indicate endothermic processes).

#### 4, OFETs Characteristics of 3a-3d

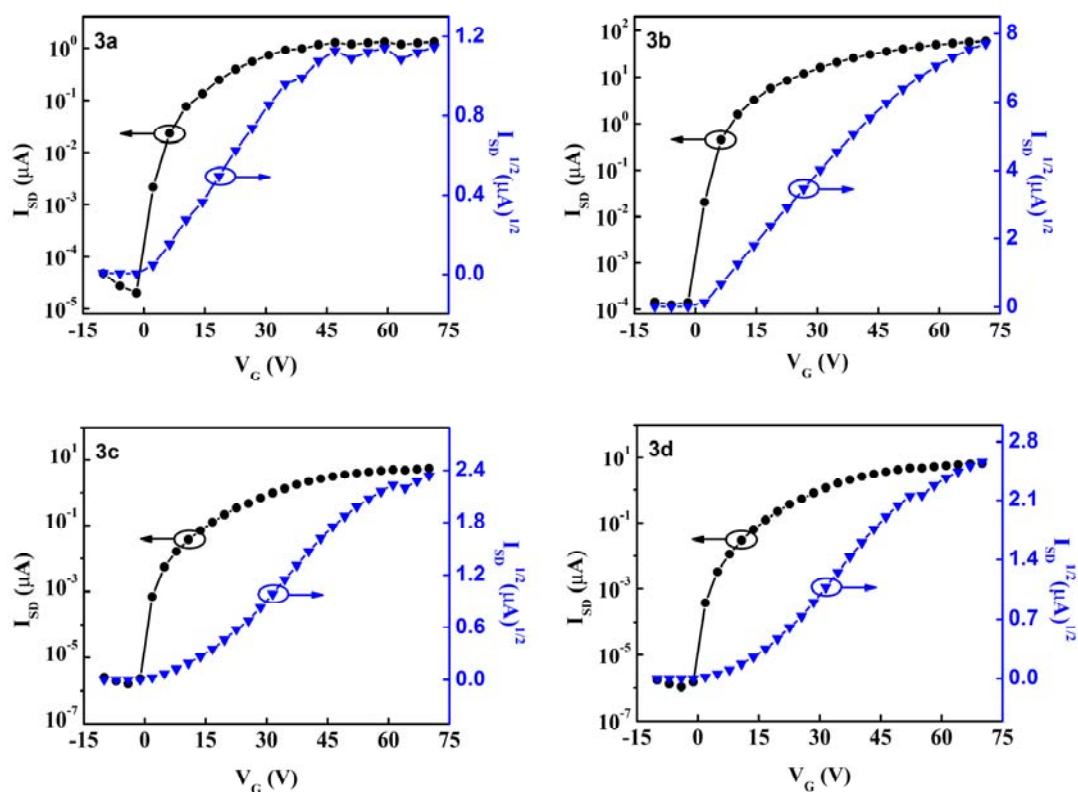

**Fig. S4** Transfer curves of the best performing thin film transistor made from **3a-3d** at optimized annealing temperature in air ( $V_{sd} = 70$  V), devices based on **3a**, **3b**, **3c**, and **3d** were fabricated by spin coating on OTS-treated Si/SiO<sub>2</sub> substrates annealed at 200, 240, 240, and 200 °C, respectively.

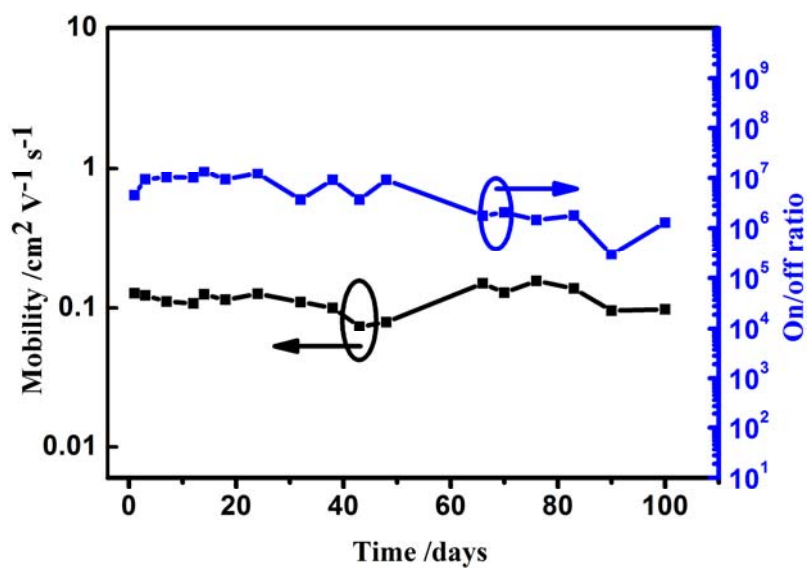

**Fig. S5** Air-stability test of compound **3b** over a period of 100 days (annealed at 200 °C).

**Table S1** Device performance of thin-film transistors for compounds **3a-3d** at various annealing temperature in air.

| Compounds | $T$<br>[°C] | $\mu$<br>[cm <sup>2</sup> V <sup>-1</sup> s <sup>-1</sup> ] | $V_T$<br>[V] | $I_{on}/I_{off}$   |
|-----------|-------------|-------------------------------------------------------------|--------------|--------------------|
| <b>3a</b> | 25          | $1.87 \times 10^{-4}$                                       | 3.72         | $6.75 \times 10^3$ |
|           | 160         | $4.17 \times 10^{-4}$                                       | 0.58         | $2.58 \times 10^4$ |
|           | 200         | $2.97 \times 10^{-3}$                                       | 0.35         | $6.52 \times 10^4$ |
|           | 240         | $1.89 \times 10^{-3}$                                       | 18.1         | $7.55 \times 10^4$ |
| <b>3b</b> | 25          | $3.77 \times 10^{-3}$                                       | 1.27         | $2.01 \times 10^5$ |
|           | 160         | $6.90 \times 10^{-2}$                                       | -1.58        | $8.67 \times 10^5$ |
|           | 200         | $1.25 \times 10^{-1}$                                       | -3.69        | $4.11 \times 10^6$ |
|           | 240         | $1.78 \times 10^{-1}$                                       | 0.95         | $5.49 \times 10^5$ |
| <b>3c</b> | 25          | $7.85 \times 10^{-4}$                                       | -3.78        | $1.22 \times 10^5$ |
|           | 160         | $9.20 \times 10^{-3}$                                       | 0.09         | $9.70 \times 10^5$ |
|           | 200         | $1.44 \times 10^{-2}$                                       | 1.71         | $1.45 \times 10^6$ |
|           | 240         | $5.44 \times 10^{-2}$                                       | 9.91         | $3.45 \times 10^6$ |
| <b>3d</b> | 25          | $4.53 \times 10^{-3}$                                       | -1.78        | $6.11 \times 10^5$ |
|           | 160         | $4.49 \times 10^{-2}$                                       | 3.03         | $5.56 \times 10^6$ |
|           | 200         | $7.38 \times 10^{-2}$                                       | 11.6         | $6.07 \times 10^6$ |
|           | 240         | $8.92 \times 10^{-3}$                                       | 4.70         | $1.43 \times 10^6$ |

### 5, AFM Images of 3a-3d

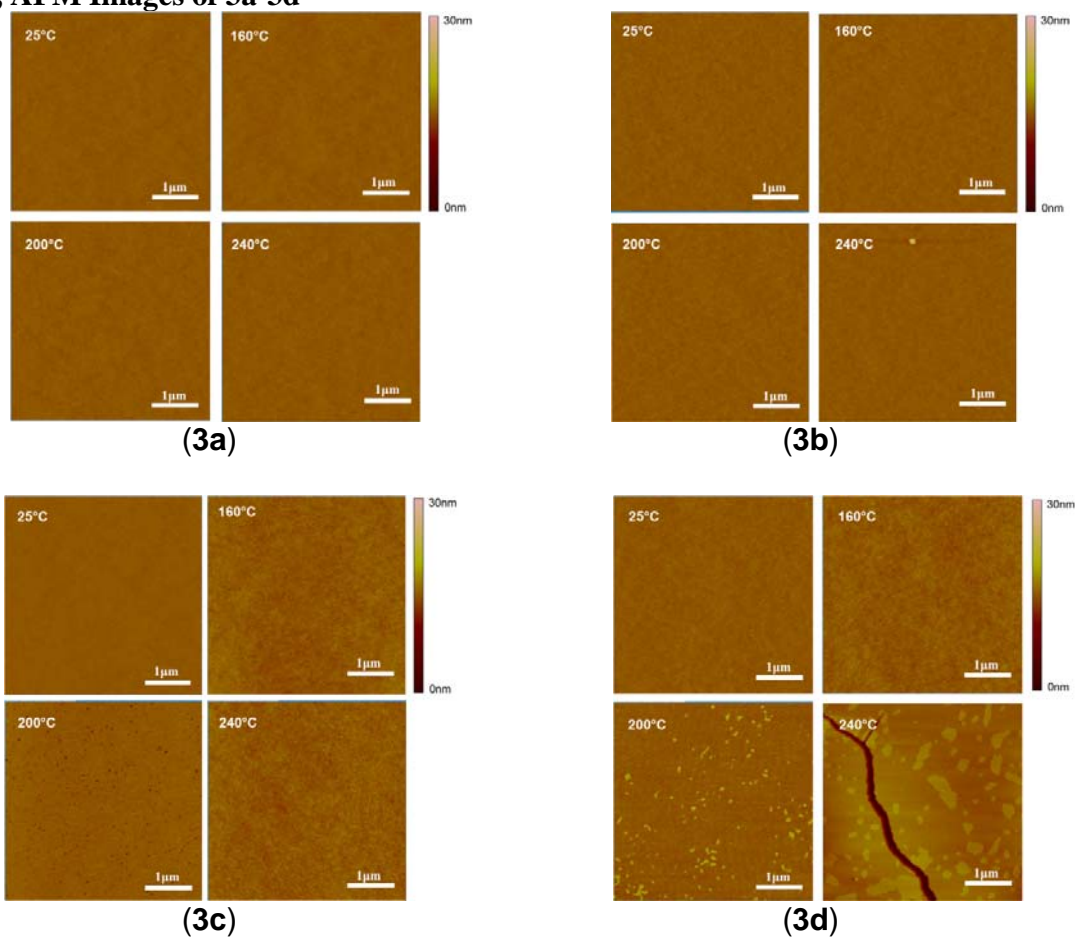

**Fig. S6** AFM images (on OTS modified Si substrate with tapping mode) of thin film of **3a-3d** after annealing at various temperatures.

## 6, NMR and MS Spectra of Compounds 3a-3d

### $^1\text{H}$ NMR Spectrum of **3a** in $\text{CDCl}_3$ at 400 MHz

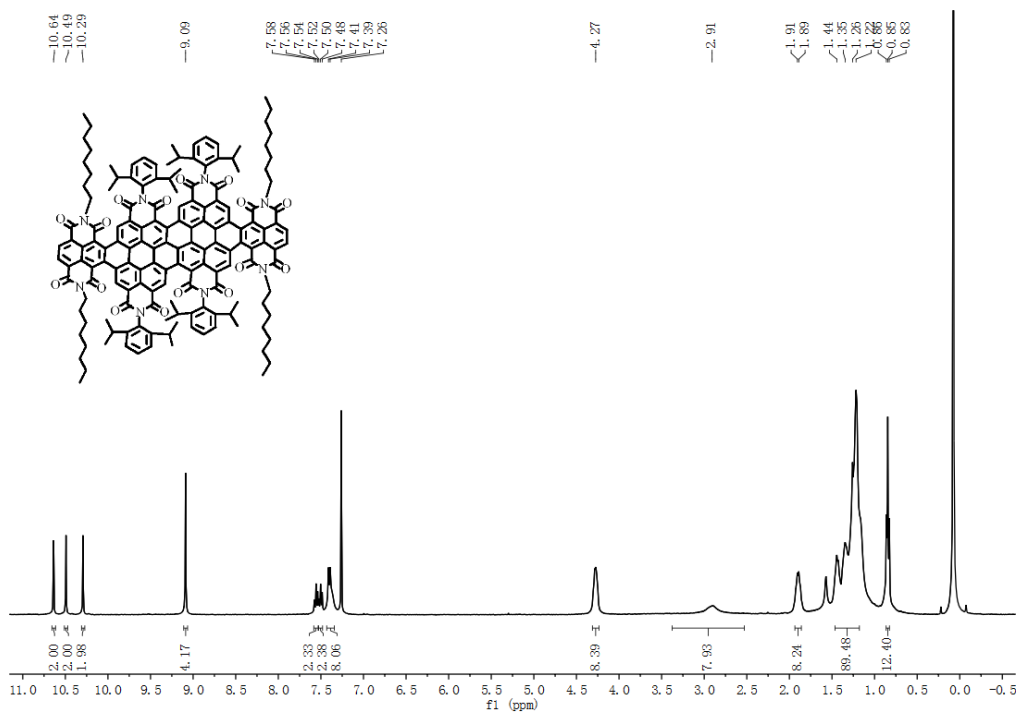

### $^{13}\text{C}$ NMR Spectrum of **3a** in $\text{CDCl}_3$ at 150 MHz

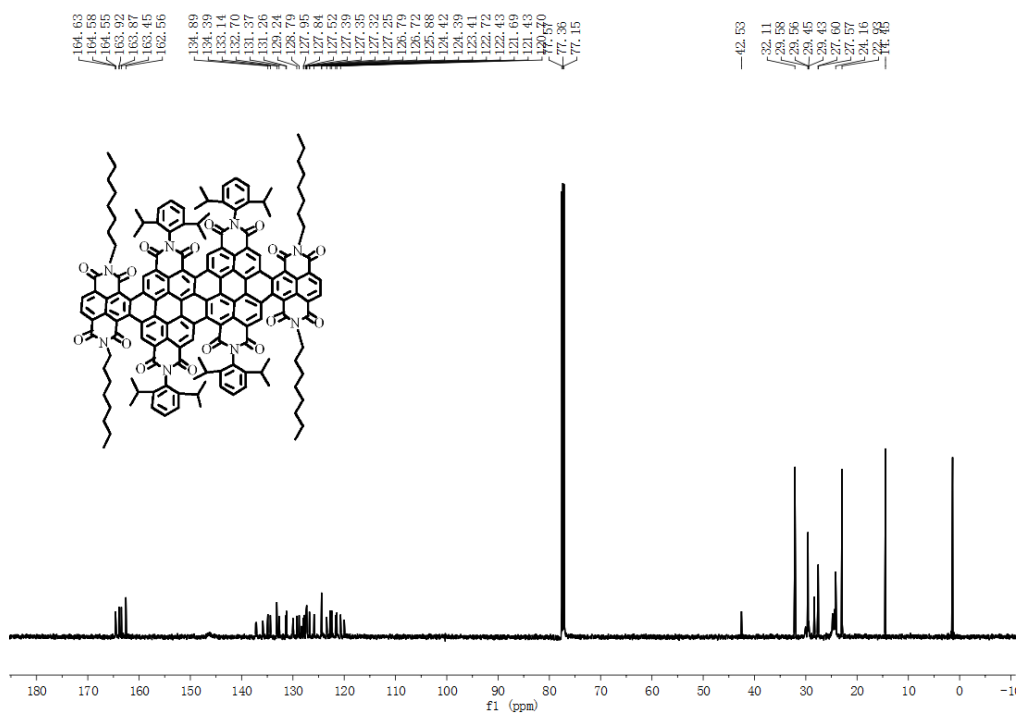

MALDI-TOF mass spectrum of **3a**

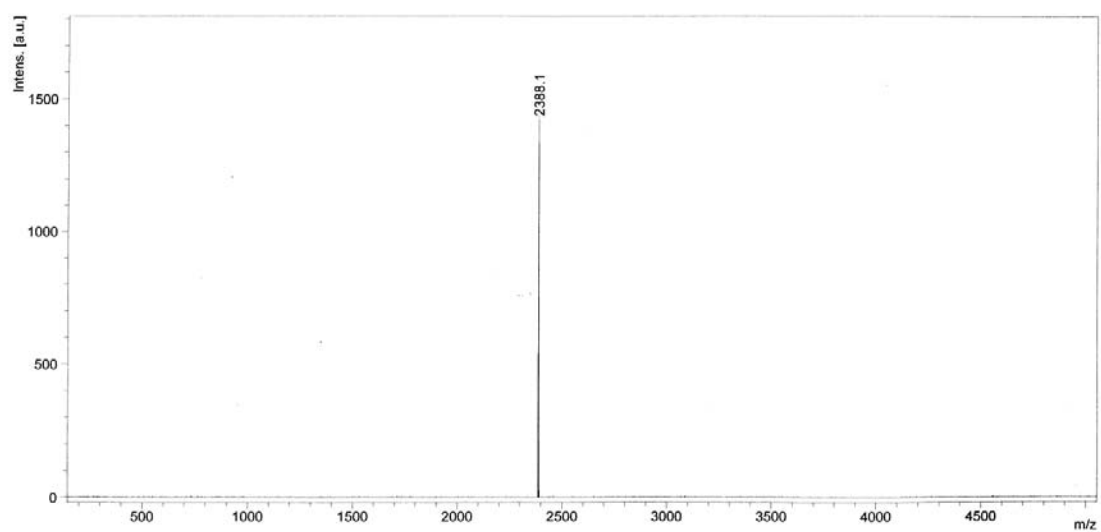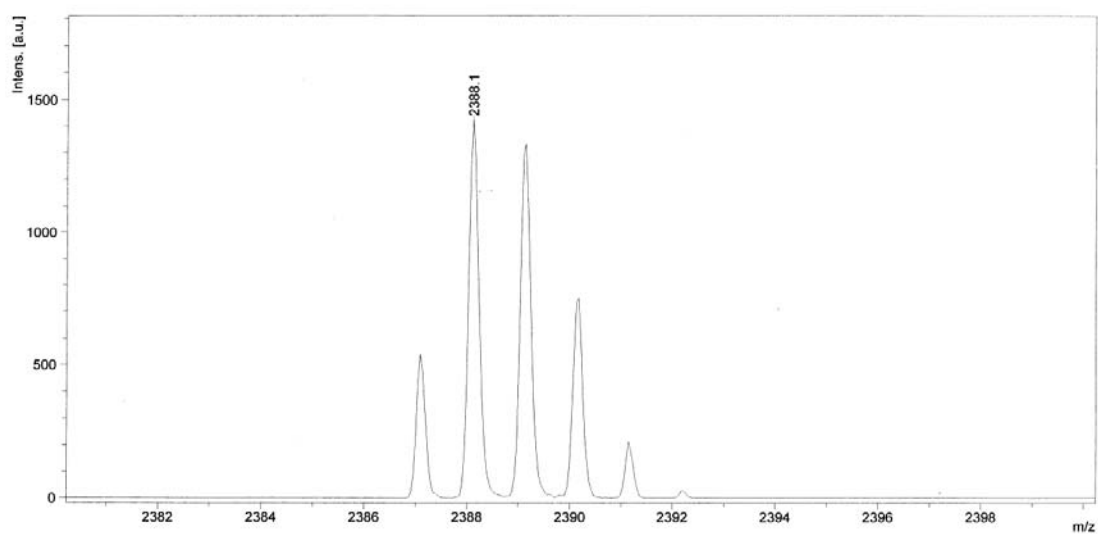



$^1\text{H}$  NMR Spectrum of **3b** in 1,1,2,2-tetrachloroethane- $\text{d}_2$  at 300 MHz

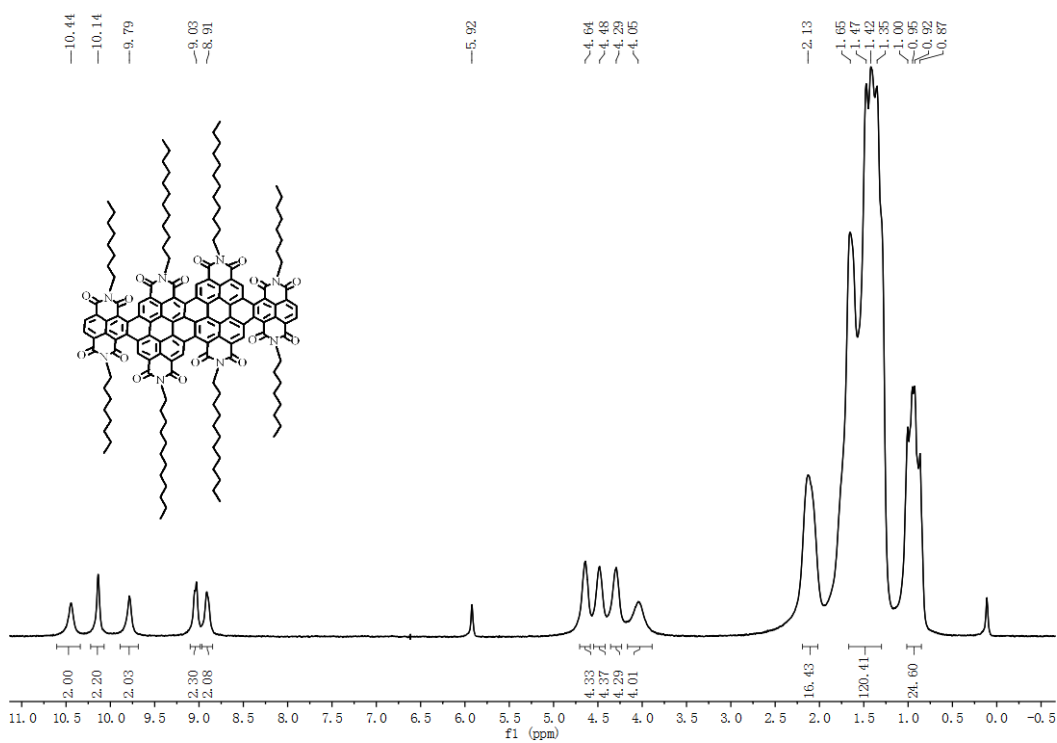

$^{13}\text{C}$  NMR Spectrum of **3b** in 1,1,2,2-tetrachloroethane- $\text{d}_2$  at 75 MHz

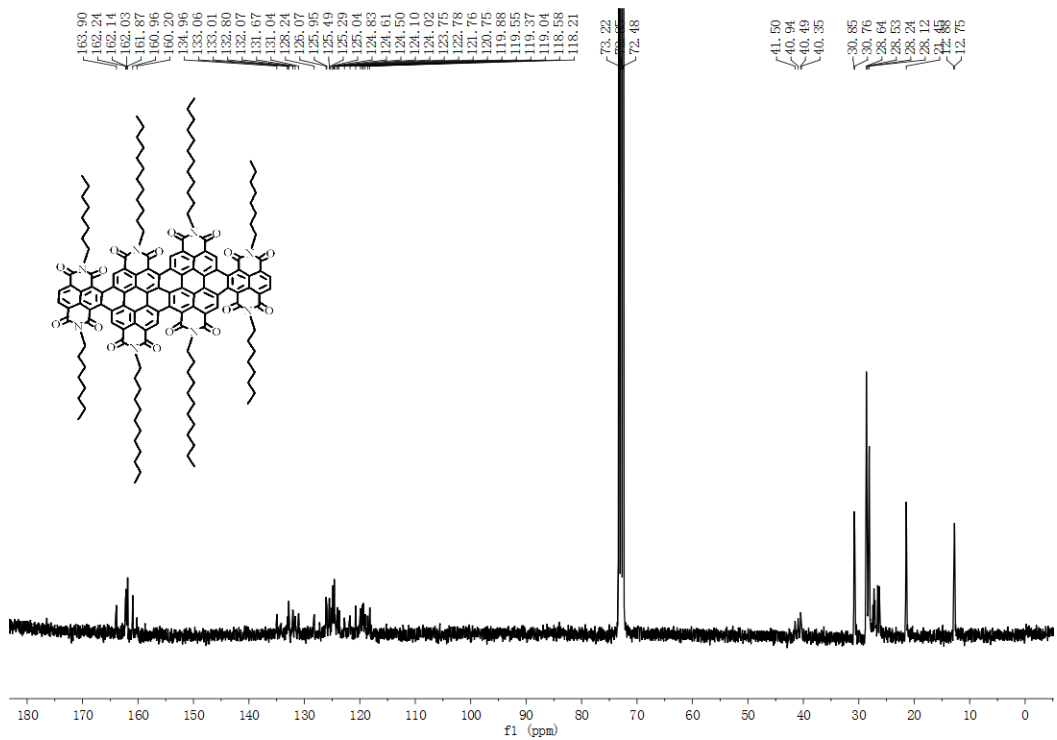

### MALDI-TOF mass spectrum of **3b**

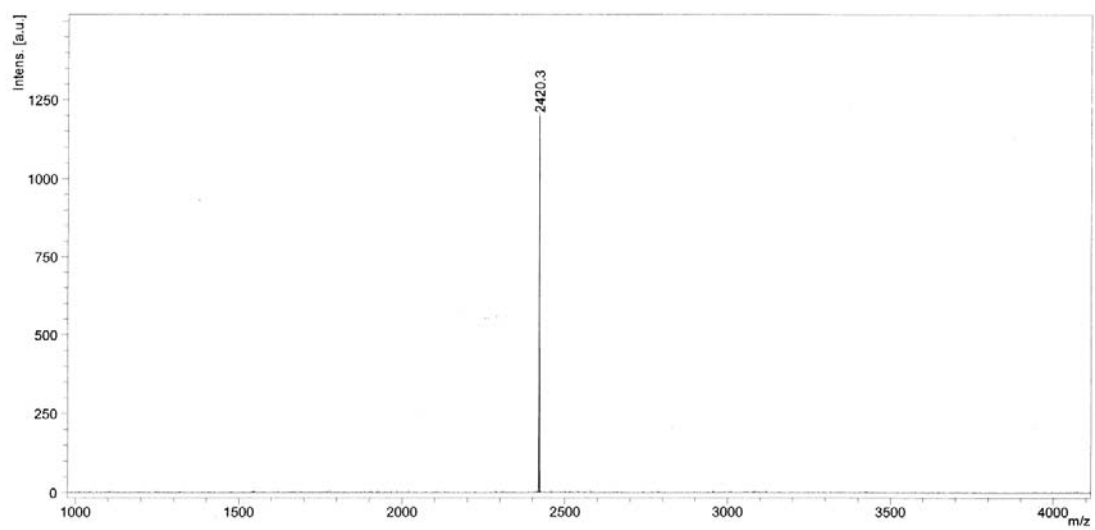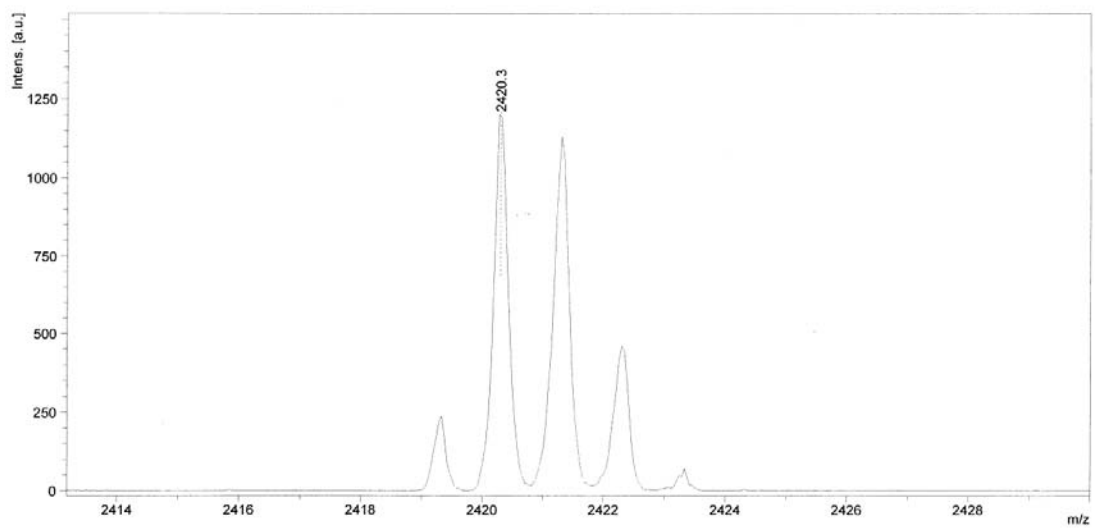

### $^1\text{H}$ NMR Spectrum of **3c** in $\text{CDCl}_3$ at 400 MHz

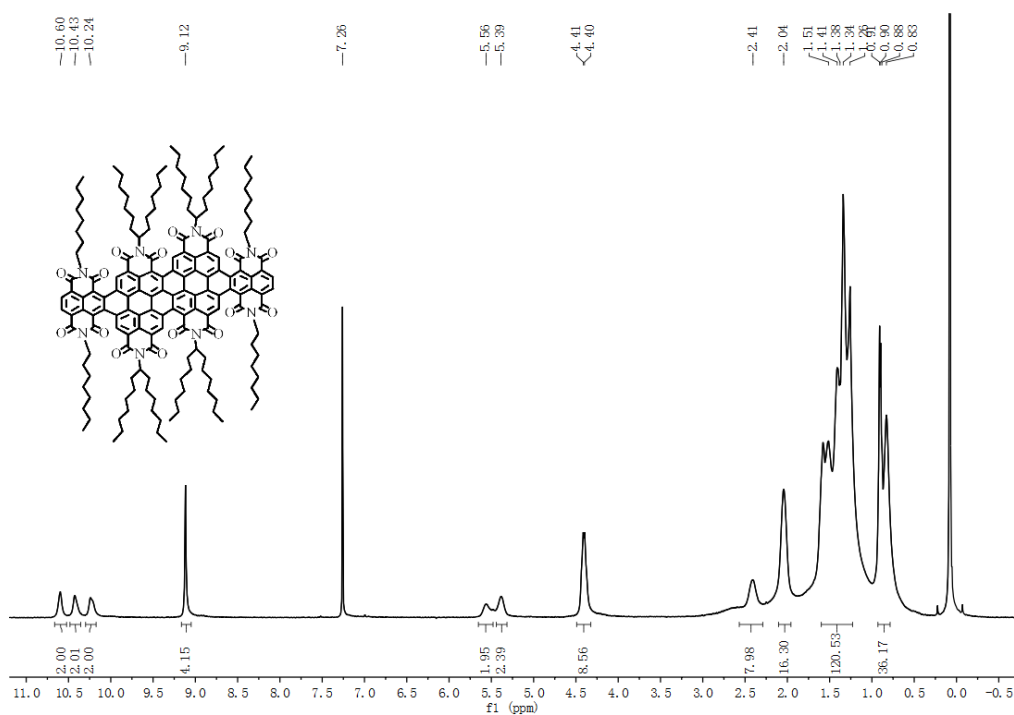

### $^{13}\text{C}$ NMR Spectrum of **3c** in $\text{CDCl}_3$ at 150 MHz

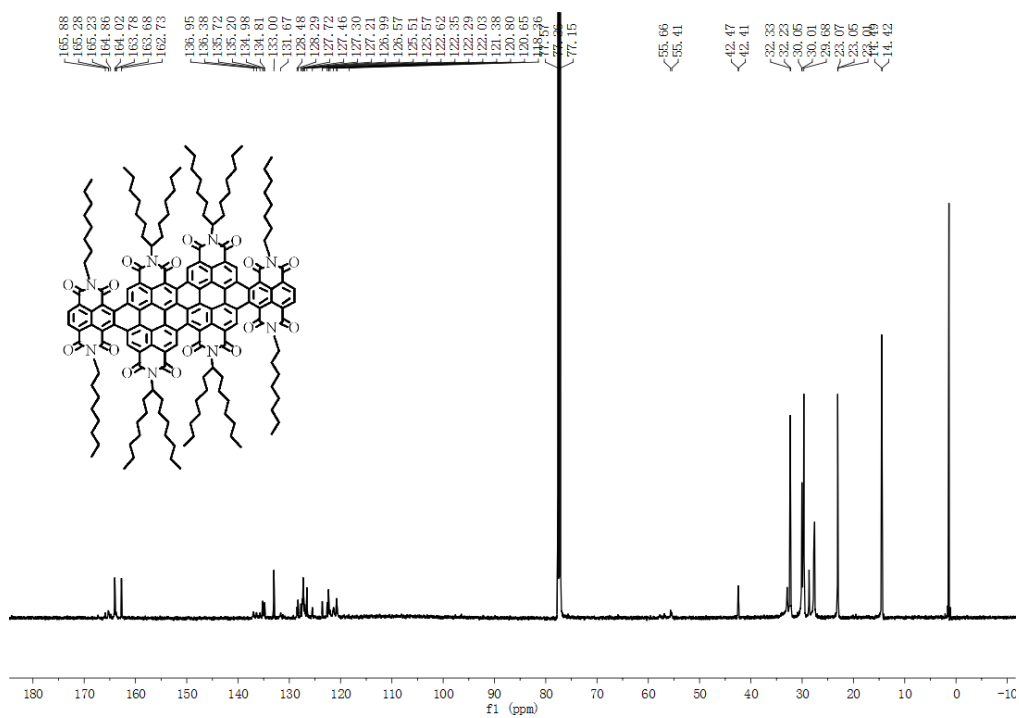

### MALDI-TOF mass spectrum of **3c**

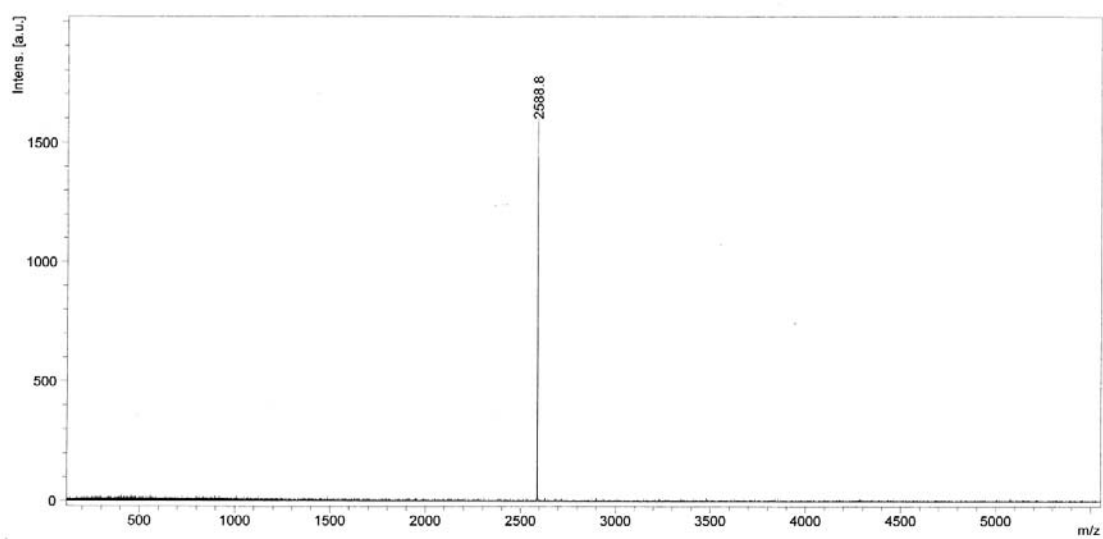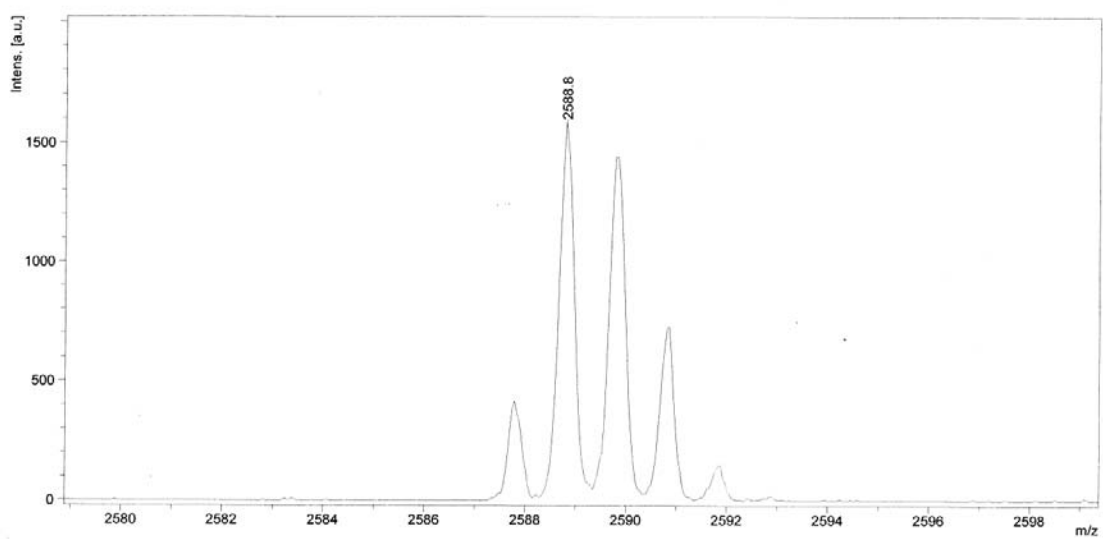

$^1\text{H}$  NMR Spectrum of **3d** in  $\text{CDCl}_3$  at 400 MHz

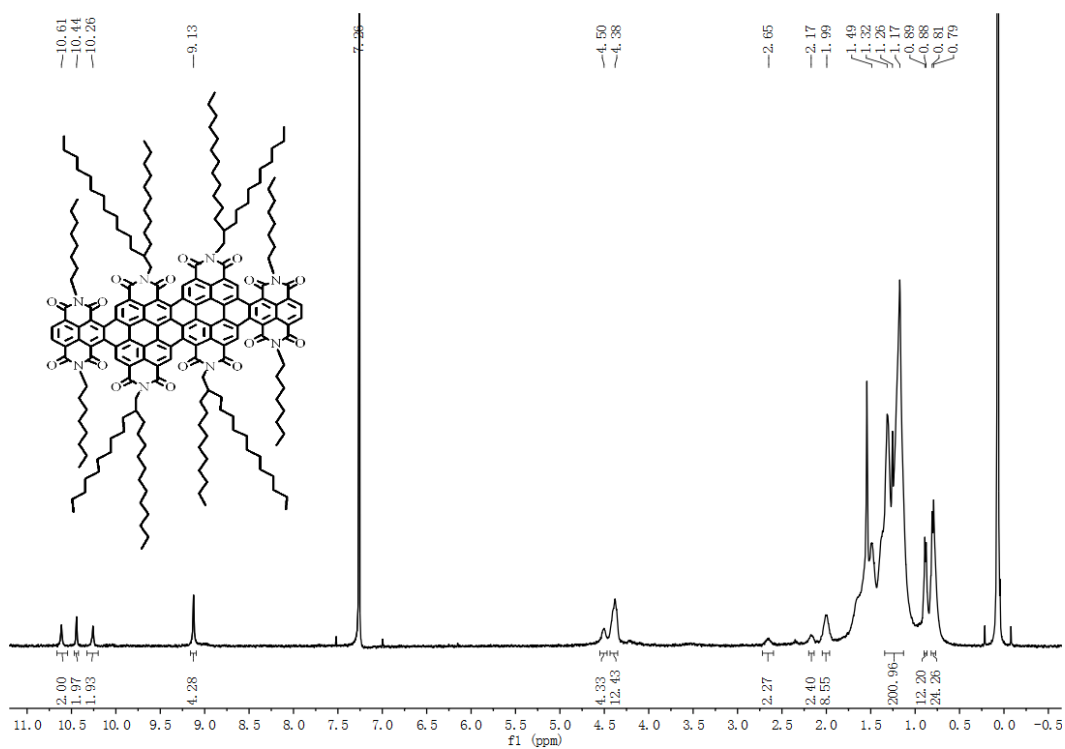

$^{13}\text{C}$  NMR Spectrum of **3d** in  $\text{CDCl}_3$  at 150 MHz

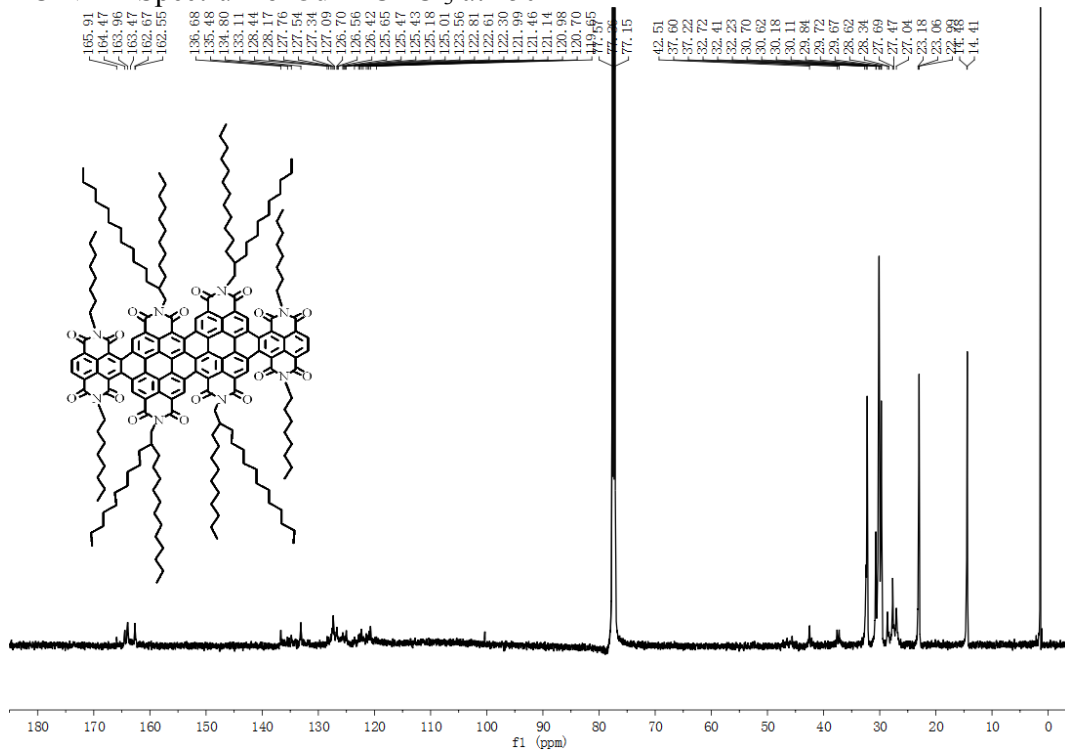

### MALDI-TOF mass spectrum of **3d**

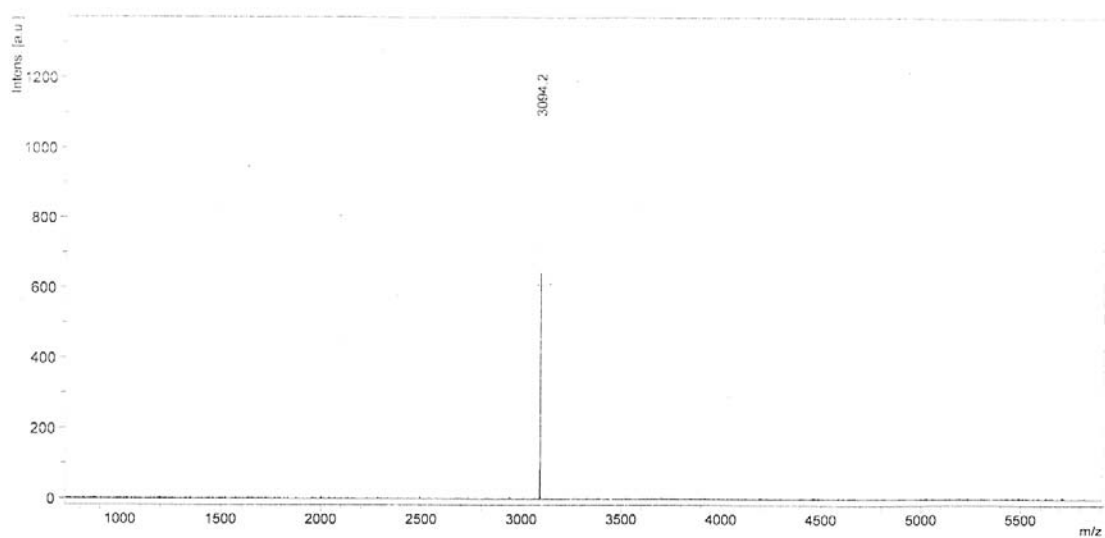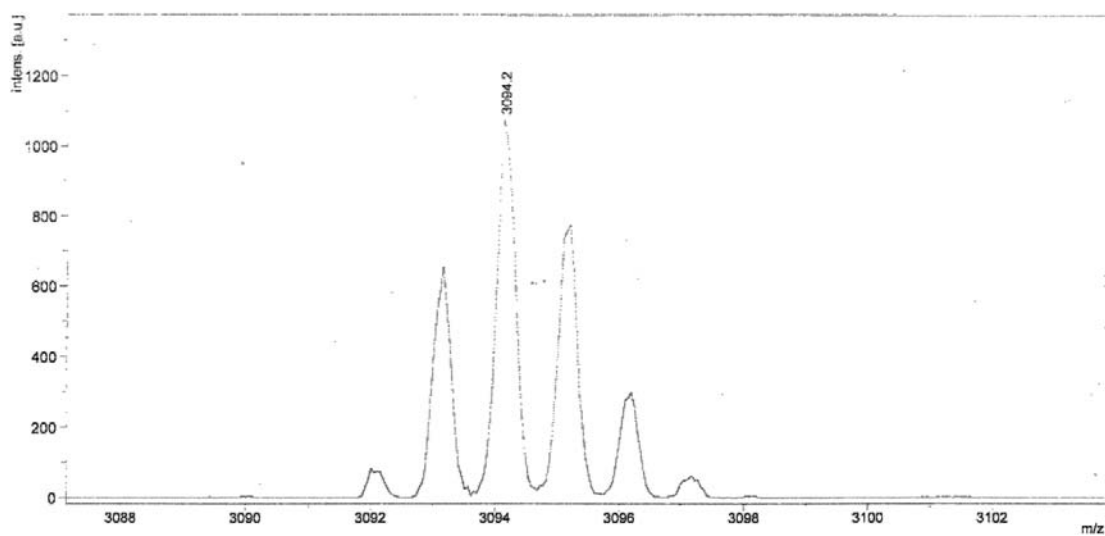

Supplement: c3tc31644k.pdf [file c3tc31644k.pdf]
